# Supplementary material for: Radioimmunotherapy in Oncology: Overview of the Last Decade Clinical Trials
Source: MDPI journal article supplement (doi:10.3390/cancers13215570), 2021-11-07
Supplement: s1 [file s1]

# Radioimmunotherapy in Oncology: Overview of the Last Decade Clinical Trials

Aurélien Rondon, Jacques Rouanet and Françoise Degoul

**Table S1.** Details of anti-CD20 RIT for non-solid cancers in clinical trials, from 2010 to 2021.

| Target/<br>Vector               | Isotope | Cancer type <sup>1</sup>    | Phase <sup>2</sup> | n <sup>3</sup> | Line of<br>treatment <sup>4</sup>                         | Associa-<br>tion <sup>5</sup> (+/−) | SCT<br>(Auto/<br>Allo/−) | Cold mAb<br>(+/−) | Fraction-<br>ation*<br>(+/−) | PFS median<br>(months) or<br>X-years PF <sup>6</sup><br>(%) | OS median<br>(months) or<br>X-years OS<br>(%) | ORR<br>(%) | CR<br>(%)     | NCT (or eq.),<br>[Ref]           |
|---------------------------------|---------|-----------------------------|--------------------|----------------|-----------------------------------------------------------|-------------------------------------|--------------------------|-------------------|------------------------------|-------------------------------------------------------------|-----------------------------------------------|------------|---------------|----------------------------------|
| <i>Ibritumomab<br/>tiuxetan</i> | Y-90    | FL                          | II                 | 74             | 1 <sup>st</sup> line                                      | −                                   | −                        | +                 | +                            | 40.2<br>3y: 58 %                                            | NR<br>3y: 95 %                                | 94         | 58            | NCT01493479,<br>[40]             |
|                                 |         | FL                          | II                 | 50             | 1 <sup>st</sup> line                                      | −                                   | −                        | +                 | −                            | NR                                                          | NR                                            | 94         | 86            | − [41]                           |
|                                 |         | FL                          | II                 | 59             | 1 <sup>st</sup> line                                      | −                                   | −                        | +                 | −                            | 25.9                                                        | NR                                            | 87         | 56            | NCT00772655,<br>[12]             |
|                                 |         | FL                          | I/II               | 47             | Conditioning<br>(R/R)                                     | +(C)                                | −                        | +                 | −                            | NR<br>3y: 85%                                               | NR<br>3y: 88%                                 | −          | −             | NCT00048737,<br>[26]             |
|                                 |         | FL                          | II                 | 61             | Consolidation                                             | +(C)                                | −                        | +                 | −                            | NR<br>6y: 68%                                               | NR<br>6y: 93%                                 | −          | 38            | − [10]                           |
|                                 |         | FL                          | II                 | 55             | Consolidation                                             | +(C)                                | −                        | +                 | −                            | NR                                                          | NR                                            | 96         | 69            | NCT00859001,<br>[11]             |
|                                 |         | FL                          | II                 | 52             | Consolidation<br>(R/R)                                    | +(C)                                | −                        | +                 | −                            | 23.1                                                        | NR                                            | 98         | 30            | NCT00637832,<br>[46]             |
|                                 |         | FL                          | III                | 207            | Consolidation                                             | +(C)                                | −                        | +                 | −                            | 49.2                                                        | NR                                            | 81         | 59            | NCT00185393,<br>[45]             |
|                                 |         | FL                          | II                 | 24             | Consolidation<br>(R/R)                                    | +(C)                                | −                        | +                 | −                            | NR<br>2 y: 59 %                                             | NR<br>2y: 95%                                 | 88         | 83            | − [47]                           |
|                                 |         | FL                          | I                  | 9              | R/R                                                       | +(C)                                | −                        | +                 | −                            | −                                                           | −                                             | 89         | 33            | − [48]                           |
|                                 |         | FL<br>MZL                   | II                 | 31             | 1 <sup>st</sup> line                                      | −                                   | −                        | +                 | −                            | NR                                                          | NR                                            | 100        | 97            | NCT00493467,<br>[42]             |
|                                 |         | MZL                         | II                 | 16             | 1 <sup>st</sup> line                                      | −                                   | −                        | +                 | −                            | 47.6<br>5 y: 40%                                            | NR<br>5 y: 72%                                | 88         | 56            | NCT00453102,<br>[43]             |
|                                 |         | FL<br>MZL                   | II                 | 20             | Consolidation                                             | +(C)                                | −                        | +                 | −                            | 47.2                                                        | NR                                            | 100        | 79            | − [13]                           |
|                                 |         | MZL                         | P                  | 30             | R/R                                                       | −                                   | −                        | +                 | −                            | NR                                                          | NR                                            | 90         | 77            | − [50]                           |
|                                 |         | MCL                         | Retro              | 46             | Conditioning                                              | +(C)                                | Auto                     | +                 | −                            | 45<br>4 y: 41%                                              | NR<br>5 y: 71%                                | 100        | 100           | − [27]                           |
|                                 |         | MCL                         | II                 | 56             | Consolidation                                             | +(C)                                | −                        | +                 | −                            | −                                                           | 94.8                                          | 82         | 55            | − [15]                           |
|                                 |         | MCL                         | II                 | 46             | Consolidation<br>(1 <sup>st</sup> line or<br>R/R)         | +(C)                                | −                        | +/-               | −                            | 1 <sup>st</sup> line: 39.6<br>R/R: 26.4                     | 1 <sup>st</sup> line: 78<br>R/R: 78           | −          | 91<br>R/R: 75 | − [21]                           |
|                                 |         | MCL                         | II                 | 56             | Consolidation                                             | +(C)                                | −                        | +                 | −                            | 34.2                                                        | NR<br>5 y: 73%                                | 82         | 55            | − [17]                           |
|                                 |         | MCL                         | P                  | 90             | Consolidation<br>(1 <sup>st</sup> line: 50%,<br>R/R: 50%) | +(C)                                | −                        | +                 | −                            | 25.3                                                        | 48.6                                          | 89<br>51   | 67<br>R/R: 38 | − [51]                           |
|                                 |         | MCL                         | II                 | 162            | Late intensifi-<br>cation                                 | +(C)                                | Auto                     | +                 | −                            | NR<br>4y: 71%                                               | NR<br>4y: 78%                                 | −          | 91            | NCT00514475,<br>[38]             |
|                                 |         | MCL<br>Low-grade B-I<br>NHL |                    | 12             | R/R                                                       | +(C)                                | −                        | +                 | −                            | 6.4                                                         | NR                                            | 50         | 42            | − [52]                           |
|                                 |         | DLBCL                       | Retro              | 63             | Conditioning                                              | +(C + R)                            | Auto                     | −                 | −                            | NR<br>2 y: 68%                                              | NR<br>2 y: 90%                                | −          | −             | − [39]                           |
|                                 |         | DLBCL                       | II                 | 30             | Conditioning<br>(R/R)                                     | +(C)                                | Auto                     | +                 | −                            | NR<br>3 y: 63%                                              | NR<br>3 y: 61%                                | 70         | 60            | EudraCT 2007-<br>003198-22, [28] |
|                                 |         | DLBCL                       | II                 | 11             | Consolidation                                             | +(C)                                | Auto                     | +                 | −                            | −<br>2 y: 18%                                               | −<br>2y: 36%                                  | −          | −             | − [16]                           |
|                                 |         | DLBCL                       | II                 | 62             | Consolidation<br>(R/R)                                    | +(C)                                | −                        | +                 | −                            | FFS median:<br>15.1                                         | 23                                            | 50         | 31            | − [22]                           |
|                                 |         | Burkitt Lym-<br>phoma       | R                  | 27             | Consolidation                                             | −                                   | −                        | +                 | −                            | NR<br>4 y: 95%                                              | NR<br>4 y: 95%                                | −          | −             | − [53]                           |
|                                 |         | B-NHL                       | II                 | 20             | Conditioning<br>(R/R)                                     | +(C)                                | Allo                     | +                 | −                            | 3 y EFS: 20%                                                | 3 y: 20%                                      | −          | −             | NCT00302757,<br>[29]             |

|                    |        |                                              |       |     |                                      |   |           |      |   |   |                                        |                                           |                         |                        |                                                             |
|--------------------|--------|----------------------------------------------|-------|-----|--------------------------------------|---|-----------|------|---|---|----------------------------------------|-------------------------------------------|-------------------------|------------------------|-------------------------------------------------------------|
|                    |        | B-NHL                                        | II    | 20  | Conditioning (R/R)                   | + | (C)       | Allo | + | – | 12                                     | –                                         | 71                      | 64                     | NCT00644371, [30]                                           |
|                    |        | B-NHL                                        | II    | 122 | Conditioning                         | + | (C)       | Auto | + | – | NR                                     | NR                                        | –                       | 36                     | NCT00695409, [33]                                           |
|                    |        | B-NHL                                        | II    | 40  | Conditioning                         | + | (C + TBI) | Allo | + | + | –                                      | –                                         | –                       | 7                      | NCT00119392, [34]                                           |
|                    |        | B-NHL                                        | Retro | 18  | Conditioning                         | + | (C)       | Allo | + | – | 2.5 y: 31%<br>3 y: 71%                 | 2.5 y: 54%<br>3 y: 87%                    | –                       | –                      | [35]                                                        |
|                    |        | B-NHL                                        | CS    | 7   | Consolidation (post ASCT)            | – |           | Auto | + | – | –                                      | –                                         | –                       | 71                     | [54]                                                        |
|                    |        | B-NHL                                        | I     | 30  | R/R                                  | + | (I)       | –    | + | + | 42.7                                   | NR                                        | 93                      | 63                     | NCT00438880, [55]                                           |
|                    |        | B-NHL                                        | II    | 5   | R/R                                  | + | (C)       | –    | + | – | –                                      | –                                         | 0                       | 0                      | NCT01686165, [56]                                           |
|                    |        | B-NHL                                        | I     | 17  | R/R                                  | – |           | –    | + | – | 12.3                                   | NR                                        | 82                      | 35                     | NCT00033423, [57]                                           |
|                    |        | MM                                           | I     | 30  | Conditioning                         | + | (C)       | Auto | + | + | 16.5                                   | 63.4                                      | 73                      | 23                     | NCT00477815, [36]                                           |
| <b>Rituximab</b>   | I-131  | FL                                           | II    | 68  | 1 <sup>st</sup> line                 | – |           | –    | + | – | –                                      | NR                                        | 99                      | 82                     | Australian Clinical Trial Registry No. 12607000153415, [44] |
|                    |        | Low-grade (Ind.) and aggressive (agg.) B-NHL | Retro | 36  | R/R                                  | – |           | –    | + | – | –                                      | –                                         | Ind.: 2.4<br>Agg.: 13.4 | Ind.: 4.3<br>Agg.: 6.7 | – [59]                                                      |
|                    |        | B-NHL                                        | I/II  | 23  | Conditioning (R/R)                   | + | (C)       | Auto | + | – | 47.5                                   | 101.5                                     | 87                      | 64                     | – [31]                                                      |
|                    |        | B-NHL                                        | II    | 31  | R/R                                  | – |           | –    | + | + | 9.8                                    | 48.2                                      | 68                      | –                      | – [58]                                                      |
|                    | Lu-177 | MCL                                          | I/II  | 31  | R/R                                  | – |           | –    | + | – | –                                      | –                                         | 52                      | 21                     | – [60]                                                      |
|                    |        | B-NHL                                        | P     | 10  | R/R                                  | – |           | –    | + | – | –                                      | –                                         | –                       | –                      | – [61]                                                      |
|                    | Y-90   | B-NHL                                        | CS    | 20  | R/R                                  | – |           | –    | + | – | –                                      | –                                         | 45                      | 10                     | – [62]                                                      |
| <b>Tositumomab</b> | I-131  | FL                                           | III   | 532 | Consolidation (1 <sup>st</sup> line) | + | (C)       | –    | – | – | NR<br>2 y: 80%                         | NR<br>2 y: 93%                            | 84                      | 45                     | NCT00006721, [18]                                           |
|                    |        | FL                                           | III   | 531 | Consolidation (1 <sup>st</sup> line) | + | (C)       | –    | – | – | NR<br>10 y: 49%                        | NR<br>10 y: 78%                           | 98                      | 41                     | NCT00006721, [20]                                           |
|                    |        | FL                                           | III   | 14  | R/R                                  | – |           | –    | + | – | NR                                     | NR                                        | –                       | 43                     | NCT00268983, [49]                                           |
|                    |        | Low-grade B-NHL                              | II    | 93  | R/R                                  | – |           | –    | + | – | 12                                     | 59.8                                      | 43                      | –                      | – [63]                                                      |
|                    |        | DLBCL                                        | III   | 224 | Conditioning (R/R)                   | + | (C)       | Auto | – | – | –<br>2 y: 47.9%                        | NR<br>2 y: 61%                            | –                       | –                      | NCT00329030, [32]                                           |
|                    |        | DLBCL                                        | II    | 84  | Consolidation (1 <sup>st</sup> line) | + | (C)       | –    | + | – | NR<br>2 y: 69%                         | NR<br>2 y: 77%                            | 86                      | 61                     | NCT00107380, [19]                                           |
|                    |        | DLBCL                                        | II    | 39  | Consolidation (1 <sup>st</sup> line) | + | (C)       | –    | + | – | All: 66.5<br>DLBCL: 36.1<br>MCL: 69.4  | All: 96.2<br>DLBCL: 36.1<br>MCL: 5 y: 79% | 92.3                    | 82                     | – [23]                                                      |
|                    |        | B-NHL                                        | I     | 36  | Conditioning (R/R)                   | + | (C)       | Auto | + | – | NR<br>3 y: 53%<br>10y: 10y:            | NR<br>3 y: 54%<br>10y: 10y:               | –                       | 79                     | NCT00110071, [64]                                           |
|                    |        | B-NHL                                        | II    | 107 | Conditioning (R/R)                   | + | (C)       | Auto | + | – | All: 61%<br>Low-grade: 64%<br>MCL: 43% | All: 62%<br>Low-grade: 71%<br>MCL: 48%    | –                       | 82                     | – [37]                                                      |
|                    |        | B-NHL                                        | CS    | 39  | R/R                                  | – |           | –    | + | – | 6.6                                    | –                                         | 62                      | 46                     | – [65]                                                      |
|                    |        | B-NHL                                        | I     | 25  | R/R                                  | + | (C)       | –    | – | – | 7                                      | –                                         | 64                      | 44                     | NCT00777114, [66]                                           |
|                    |        | HL                                           | I     | 12  | R/R                                  | – |           | –    | – | – | –                                      | –                                         | –                       | –                      | – [67]                                                      |

<sup>1</sup>B-NHL: B-cell non-Hodgkin lymphoma; DLBCL: Diffuse large B-cell lymphoma; FL: Follicular lymphoma; HL: Hodgkin lymphoma; MCL: Mantle cell lymphoma; MM: Multiple myeloma; MZL: Marginal zone lymphoma. <sup>2</sup>CS: Case series; P: Prospective; Retro: Retrospective. <sup>3</sup>n: Number of patients. <sup>4</sup>R/R: Relapsed/refractory; SCT: Stem-cell transplantation. <sup>5</sup>(C): Chemotherapy; (I): Immunotherapy; (R): Radiotherapy; (TBI): Total-body irradiation. CR: Complete response; DFS: Disease-free survival; EFS: Event-free survival; FFS: Failure-free survival; NR: Non-reached; ORR: Overall response rate; OS: Overall survival. \*Fractionation concerns RIT protocol.
